# Supplementary material for: Spin-dimer networks: engineering tools to adjust the magnetic interactions in biradicals
Source: Royal Society of Chemistry journal article supplement (doi:10.1039/c7tc03357e), 2017-01-01
Supplement: c7tc03357e1.pdf [file c7tc03357e1.pdf]

## Supporting Information for

# Spin-Dimer Networks: Engineering Tools to Adjust the Magnetic Interactions in Biradicals

Yulia B. Borozdina, Evgeny A. Mostovich, Pham Thanh Cong, Lars Postulka, Bernd Wolf, Michael Lang and  
Martin Baumgarten\*

### Content:

|                                                                                                                                                                                                |    |
|------------------------------------------------------------------------------------------------------------------------------------------------------------------------------------------------|----|
| <b>Table S1.</b> Selected structural data for the nitronyl <b>1c</b> , <b>2c</b> and imino <b>1d</b> , <b>3d</b> , <b>4d</b> , <b>5d</b> nitroxide biradicals.....                             | S2 |
| <b>Figure S1.</b> Fragments of the dimeric couple in crystal packing of <b>1c</b> with the emphasized short contacts.....                                                                      | S3 |
| <b>Figure S2.</b> Crystal packing of biradical <b>2c</b> : view along the <i>b</i> and <i>c</i> axes.....                                                                                      | S3 |
| <b>Figure S3.</b> Fragment of the crystal packing of <b>2c</b> with emphasized short contacts and $\pi$ -stacking.....                                                                         | S3 |
| <b>Figure S4.</b> Fragment of the crystal packing of <b>4d</b> with emphasized short contacts and $\pi$ -stacking.....                                                                         | S4 |
| <b>Figure S5.</b> Fragments of the crystal packing of <b>5d</b> with emphasized short contacts and $\pi$ -stacking.....                                                                        | S4 |
| <b>Table S2.</b> Selected spectroscopic data for the nitroxide biradicals <b>1c</b> , <b>2c</b> , <b>1d</b> , <b>3d</b> , <b>4d</b> , <b>5d</b> .....                                          | S4 |
| <b>Figure S6.</b> Effective magnetic moment $\mu_{\text{eff}} = \chi \cdot T$ and molar susceptibility $\chi_{\text{mol}}$ of biradicals <b>1d</b> , <b>3d</b> , <b>4d</b> and <b>5d</b> ..... | S5 |
| <b>Figure S7.</b> Crystal structure of the nitronyl biradical <b>2c</b> with emphasized short antiferromagnetic contacts.....                                                                  | S6 |

**Table S1.** Selected structural data for the nitronyl **1c**, **2c** and imino **1d**, **3d**, **4d**, **5d** nitroxide biradicals

|                                                  | <b>1c</b>                                                     | <b>2c</b>                                                     | <b>1d</b>                                                     | <b>3d</b>                                                     | <b>4d</b>                                                     | <b>5d</b>                                                     |
|--------------------------------------------------|---------------------------------------------------------------|---------------------------------------------------------------|---------------------------------------------------------------|---------------------------------------------------------------|---------------------------------------------------------------|---------------------------------------------------------------|
| <b>Formula</b>                                   | C <sub>26</sub> H <sub>30</sub> N <sub>6</sub> O <sub>4</sub> | C <sub>26</sub> H <sub>30</sub> N <sub>6</sub> O <sub>4</sub> | C <sub>26</sub> H <sub>30</sub> N <sub>6</sub> O <sub>2</sub> | C <sub>26</sub> H <sub>32</sub> N <sub>4</sub> O <sub>2</sub> | C <sub>24</sub> H <sub>30</sub> N <sub>6</sub> O <sub>2</sub> | C <sub>28</sub> H <sub>32</sub> N <sub>4</sub> O <sub>2</sub> |
| <b>M</b>                                         | 490                                                           | 490                                                           | 458                                                           | 432                                                           | 434                                                           | 456                                                           |
| <b>crystal system</b>                            | triclinic                                                     | monoclinic                                                    | triclinic                                                     | monoclinic                                                    | monoclinic                                                    | monoclinic                                                    |
| <b>space group</b>                               | <i>P</i> -1                                                   | <i>P</i> 2 <sub>1</sub> / <i>c</i>                            | <i>P</i> -1                                                   | <i>P</i> 2 <sub>1</sub> / <i>n</i>                            | <i>P</i> 2 <sub>1</sub> / <i>n</i>                            | <i>P</i> 2 <sub>1</sub> / <i>n</i>                            |
| <b><i>a</i>, Å</b>                               | 7.3674(2)                                                     | 10.0305(5)                                                    | 7.0420(3)                                                     | 6.2359(6)                                                     | 6.3011(2)                                                     | 6.6883(2)                                                     |
| <b><i>b</i>, Å</b>                               | 13.0178(4)                                                    | 10.5040(7)                                                    | 12.9582(9)                                                    | 10.5265(7)                                                    | 10.4759(5)                                                    | 10.3043(4)                                                    |
| <b><i>c</i>, Å</b>                               | 13.7189(4)                                                    | 12.3508(6)                                                    | 14.2234(9)                                                    | 17.6917(9)                                                    | 17.1953(7)                                                    | 18.2359(5)                                                    |
| <b><math>\alpha</math>, deg</b>                  | 90.9445(14)                                                   | 90                                                            | 94.407(3)                                                     | 90                                                            | 90                                                            | 90                                                            |
| <b><math>\beta</math>, deg</b>                   | 104.498(2)                                                    | 102.582(3)                                                    | 103.761(2)                                                    | 94.553(4)                                                     | 98.045                                                        | 93.231(2)                                                     |
| <b><math>\gamma</math>, deg</b>                  | 104.2092(16)                                                  | 90                                                            | 102.863(3)                                                    | 90                                                            | 90                                                            | 90                                                            |
| <b>V, Å<sup>3</sup></b>                          | 1230.61                                                       | 1270.04                                                       | 1217.41                                                       | 1157.66                                                       | 1123.89(8)                                                    | 1254.79(7)                                                    |
| <b>Z</b>                                         | 2                                                             | 2                                                             | 2                                                             | 2                                                             | 2                                                             | 2                                                             |
| <b><i>R</i><sub>factor</sub>(%)</b>              | 5.24                                                          | 5.5                                                           | 6.21                                                          | 5.18                                                          | 5.26                                                          | 4.01                                                          |
| <b><i>D</i><sub>c</sub>, g × cm<sup>-3</sup></b> | 1.324                                                         | 1.283                                                         | 1.251                                                         | 1.241                                                         | 1.284                                                         | 1.208                                                         |
| <b><i>N</i><sub>ref</sub></b>                    | 7176                                                          | 3696                                                          | 6769                                                          | 2527                                                          | 3217                                                          | 3669                                                          |
| <b><i>N</i><sub>par</sub></b>                    | 325                                                           | 163                                                           | 334                                                           | 154                                                           | 154                                                           | 154                                                           |
| <b>S</b>                                         | 0.986                                                         | 1.073                                                         | 0.978                                                         | 1.025                                                         | 1.091                                                         | 1.112                                                         |
| <b>CCDC</b>                                      | 823716                                                        | 816632                                                        | 816630                                                        | 823717                                                        | 858078                                                        | 810139                                                        |

The crystallographic data were collected on Nonius Kappa CCD (Mo  $\alpha$ ,  $\mu$  = 0.71073 Å) diffractometer equipped with a graphite monochromator

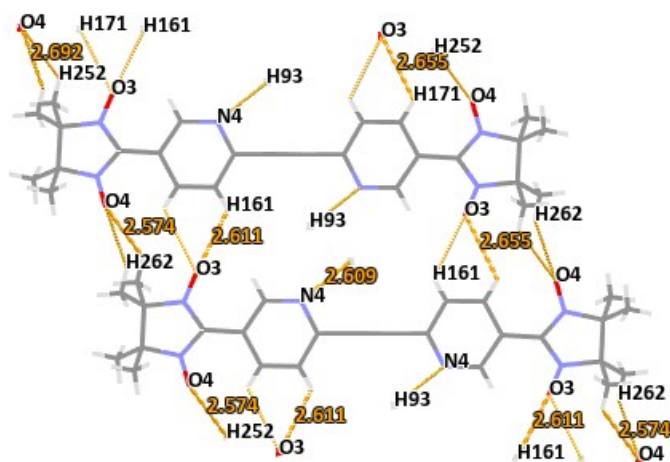

**Figure S1.** Fragment of the dimeric couple in crystal packing of **1c** with the emphasized short contacts.

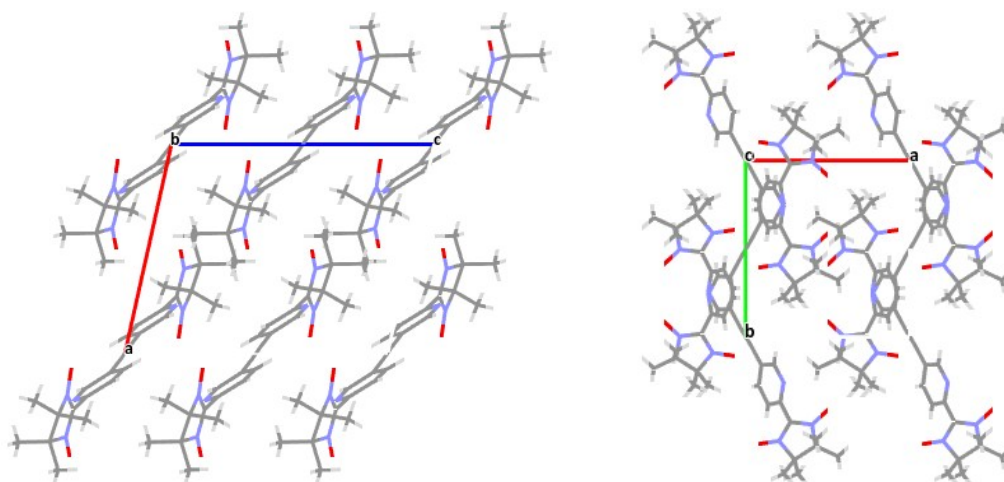

**Figure S2.** Crystal packing of biradical **2c**: view along the *b* axes (left) and *c* axes (right).

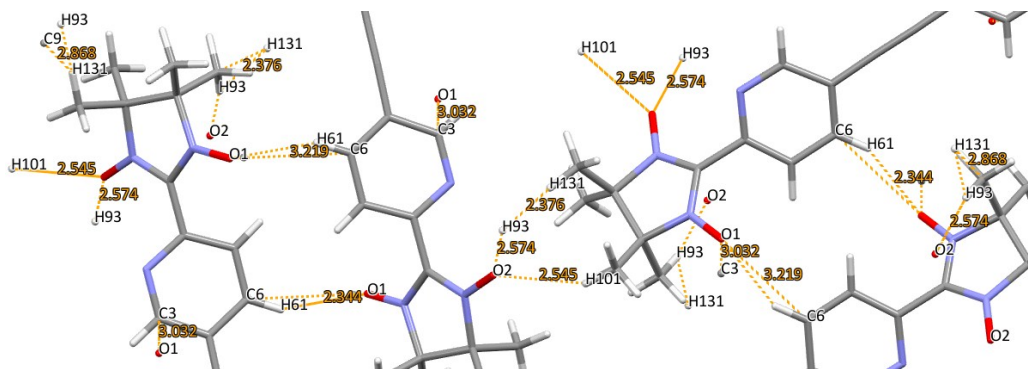

**Figure S3.** Fragment of the crystal packing of **2c** with emphasized short contacts and  $\pi$ -stacking.

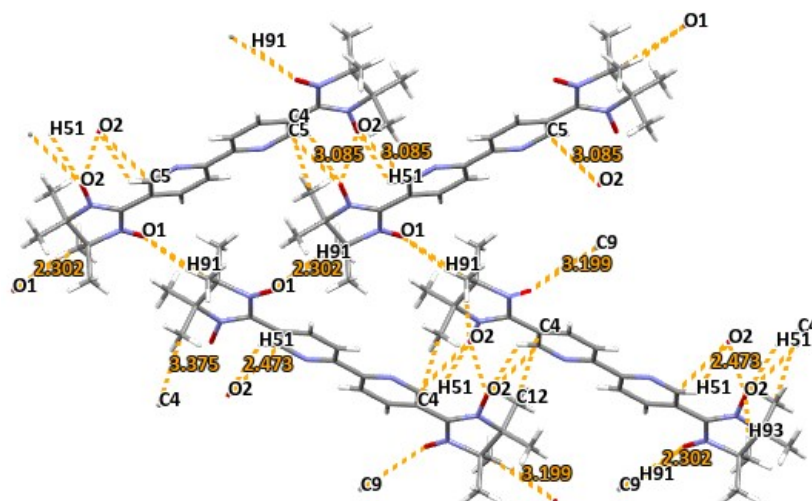

**Figure S4.** Fragment of the crystal packing of **4d** with emphasized short contacts and  $\pi$ -stacking (view along the  $a$  axes).

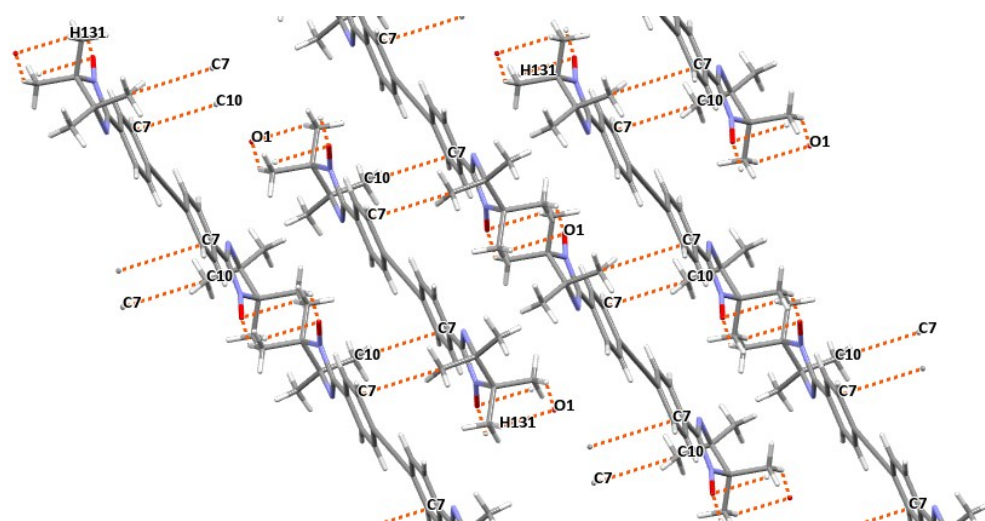

**Figure S5.** Fragments of the crystal packing of **5d** viewed along the  $b$  axes.

**Table S2** Selected spectroscopic data for the nitroxide biradicals **1c**, **2c**, **1d**, **3d**, **4d**, **5d**

| Biradical | IR <sup>[a]</sup><br>$\nu_{\text{NO}}/\text{cm}^{-1}$ | UV-Vis <sup>[b]</sup><br>$\lambda_{\text{max}}/\text{nm}$ ( $\epsilon/\text{M}^{-1}\text{cm}^{-1}$ ) <sup>[b]</sup> | Mass <sup>[c]</sup> g/mol | EPR<br>$a_{\text{N}}/\text{mT}$ |
|-----------|-------------------------------------------------------|---------------------------------------------------------------------------------------------------------------------|---------------------------|---------------------------------|
| <b>1c</b> | 1348                                                  | 627 (557)                                                                                                           | 489                       | 0.738                           |
| <b>2c</b> | 1360                                                  | 589 (502)                                                                                                           | 489                       | 0.752                           |
| <b>1d</b> | 1368                                                  | 467 (944)                                                                                                           | 457                       | 0.430, 0.885                    |
| <b>3d</b> | 1364                                                  | 461 (1090)                                                                                                          | 431                       | 0.430, 0.870                    |
| <b>4d</b> | 1366                                                  | 462 (1021)                                                                                                          | 433                       | 0.430, 0.849                    |
| <b>5d</b> | 1365                                                  | 468 (1091)                                                                                                          | 455                       | 0.430, 0.849                    |

<sup>[a]</sup> Measured in solid state at room temperature ( $T = 293$  K);

<sup>[b]</sup> Measured in toluene solution;

<sup>[c]</sup> Measured in dichloromethane by FAB. The  $m/z^+$  (100%) peak corresponds to  $[\text{M}]^+$

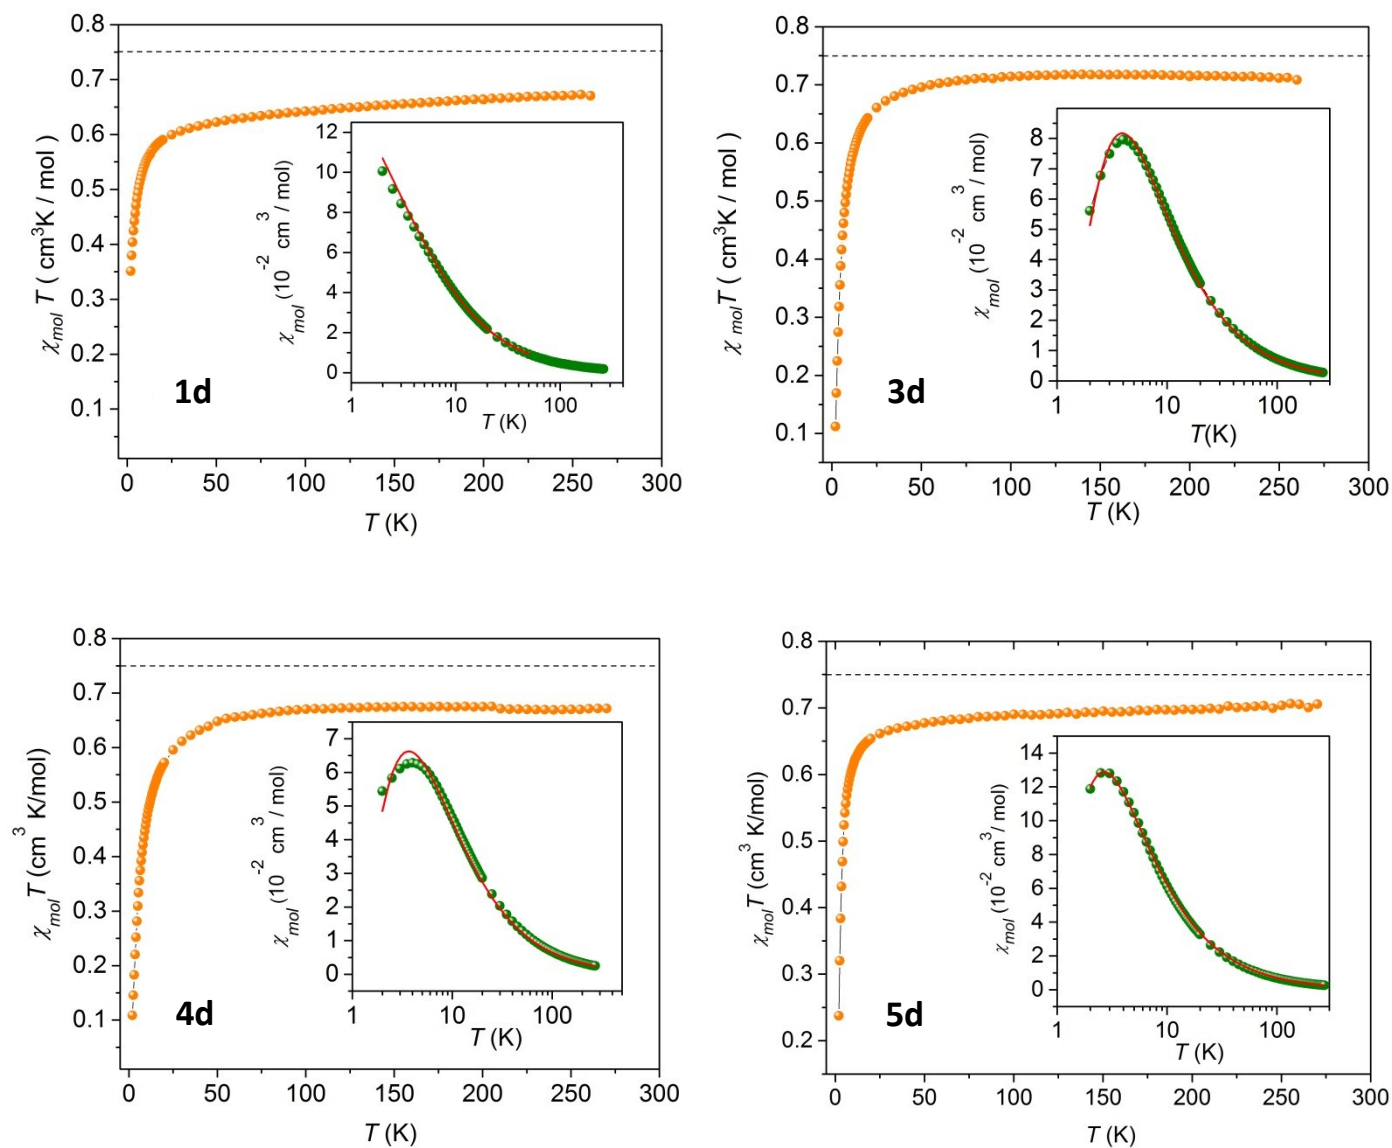

**Figure S6.** Effective magnetic moment  $\mu_{\text{eff}} = \chi \cdot T$  per  $S = \frac{1}{2}$  spin of biradicals **1d**, **3d**, **4d** and **5d**. Inset: molar susceptibility  $\chi_{\text{mol}}$  as a function of temperature together with fitting calculation.

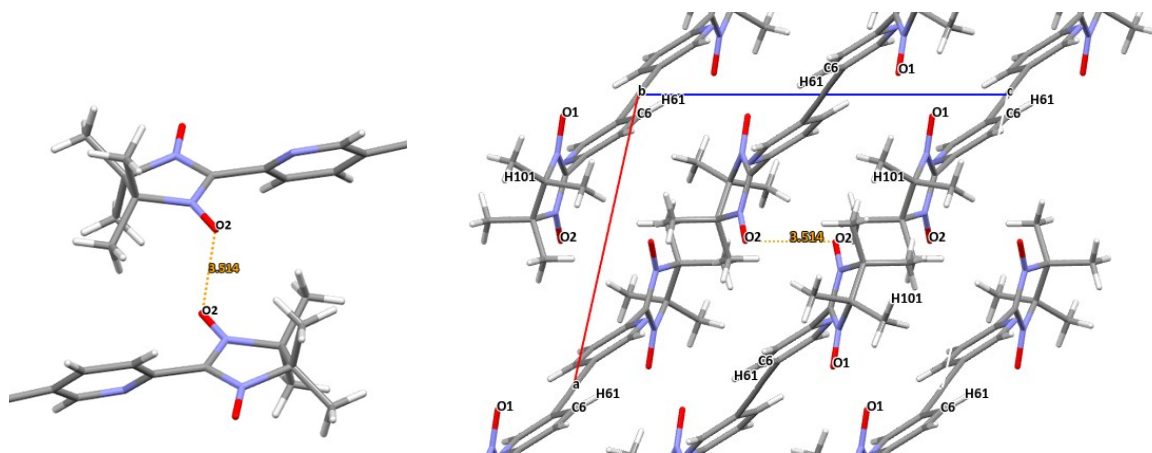

**Figure S7.** Crystal structure of the nitronyl biradical **2c**: fragment of the structure with emphasized short antiferromagnetic contacts of 3.514 Å, where the second radical unit of each biradical was replaced by H for the calculations.
